# Supplementary material for: Novel Intraoperative Navigation Using Ultra-High-Resolution CT in Robot-Assisted Partial Nephrectomy
Source: MDPI journal article supplement (doi:10.3390/cancers14082047), 2022-04-18
Supplement: s1 [file s1]

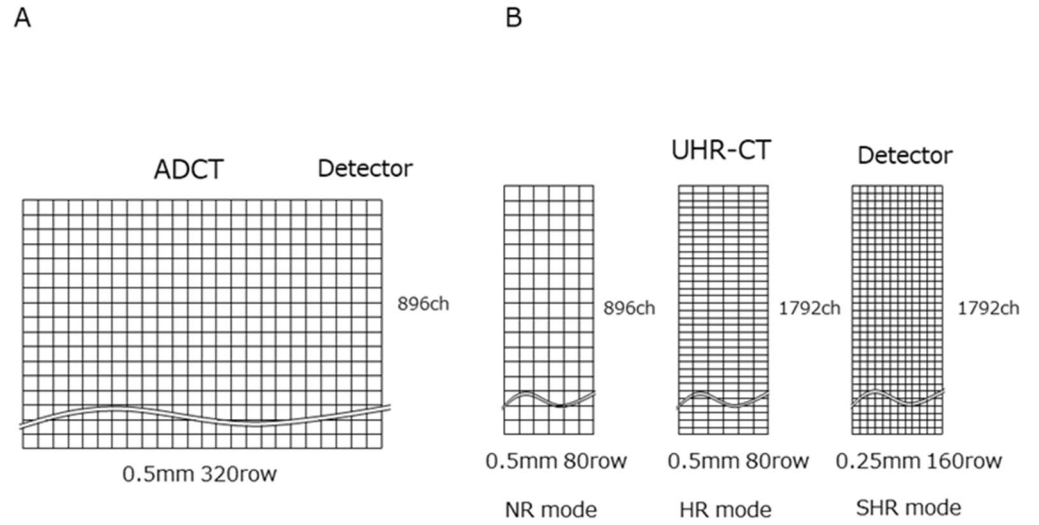

**Figure S1.** Schematic demonstrating the difference in detector architecture between ultra-high-resolution computed tomography (CT) and area-detector CT. **(A)** Overview of the area-detector CT detector. **(B)** Overview of the ultra-high-resolution CT detector and scan mode.

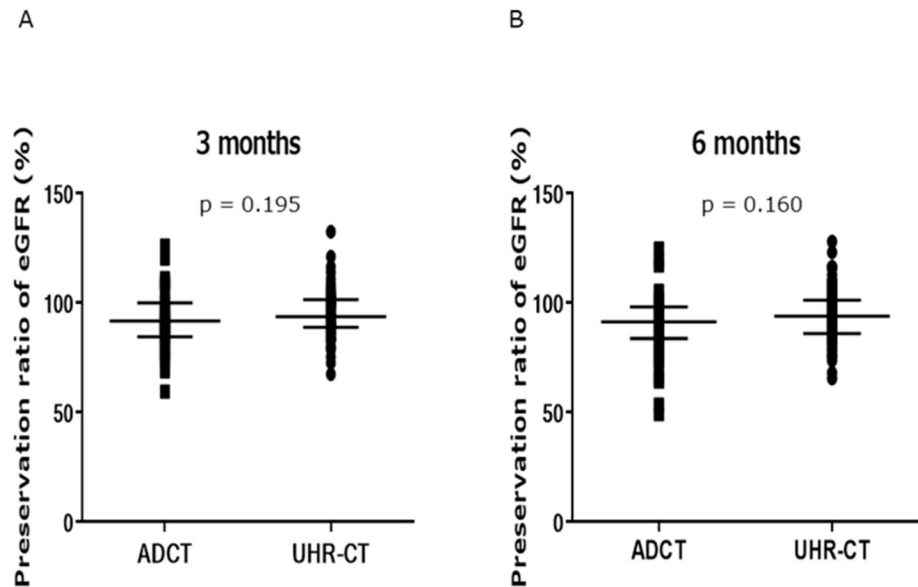

**Figure S2.** Preservation ratio of postoperative eGFR at 3 or 6 months (ADCT vs. UHR-CT, median with interquartile range). ADCT, area-detector computed tomography; UHR-CT, ultra-high-resolution computed tomography.
